# Supplementary material
Source: publisher figshare collection journal article supplement (https://tandf.figshare.com/ndownloader/files/25876015)
Supplement: Supplementary file 1 [file 25876015]

Table S1. Repurposed drug candidates undergoing clinical trials against COVID-19. The trial codes were mainly retrieved from [63] and were verified in the NIH clinical trials database (https://clinicaltrials.gov/).

| **Drug name** | **Drug class (original indication)** | **Stage of development (Phase)** | **Sponsor** | **Clinical trial identifier** |
| --- | --- | --- | --- | --- |
| **Single therapies** | | | | |
| Losartan | Antihypertensive | 2 | University of Minnesota | NCT04311177 |
| 3 | Bassett Healthcare | NCT04328012 |
| Arbidol (Umifenovir) | Antiviral | 4 (Not yet recruiting) | Ruijin Hospital | NCT04260594 |
| 4 (Recruiting) | Tongji Hospital | NCT04254874 |
| 4 (Recruiting) | Tongji Hospital | NCT04255017 |
| Carrimycin | Antibiotic | 4 (Not yet recruiting) | Beijing YouAn Hospital | NCT04286503 |
| Molnupiravir | Antiviral | 2 | Ridgeback Biotherapeutics, LP | NCT04405570 |
| 2 | NCT04405739 |
| Hydroxychloroquine | Antimalarial | 4 (Not yet recruiting) | Instituto de Investigación Marqués de Valdecilla | NCT04330495 |
| 3 | Massachusetts General Hospital | NCT04332991 |
| 2, 3 | University of Washington | NCT04328961 |
| 2 | Asan Medical Center | NCT04307693 |
| 2, 3 | Oslo University Hospital | NCT04321616 |
| 3 | Shanghai Public Health Clinical Center | NCT04261517 |
| 3 | Hospital do Coração | NCT04322123 |
| 3 | University Hospital, Angers | NCT04325893 |
| 3 | University of Minnesota | NCT04308668 |
| 1 | Sanofi | NCT04333654 |
| 3 | Institut National de la Santé Et de la Recherche Médicale, France | NCT04315948 |
| 3 | Hospital Israelita Albert Einstein | NCT04321278 |
| 2, 3 | Columbia University | NCT04318444 |
| 3 | National Institute of Respiratory Diseases, Mexico | NCT04318015 |
| 2 | University of Pennsylvania | NCT04329923 |
| early 1 | Rambam Health Care Campus | NCT04323631 |
| 3 | Barcelona Institute for Global Health | NCT04331834 |
| 3 | Gangnam Severance Hospital | NCT04330144 |
| 3 | National Institute of Respiratory Diseases, Mexico | NCT04315896 |
| 3 | Centre Hospitalier Universitaire de Saint Etienne | NCT04328285 |
| 2 | Intermountain Health Care, Inc. | NCT04329832 |
| 3 | University of Calgary | NCT04329611 |
| 3 | Ayub Medical College, Abbottabad | NCT04328272 |
| Chloroquine | Antimalarial | 4 (Recruiting) | Wroclaw Medical University | NCT04331600 |
| 2 | Fundação de Medicina Tropical Dr. Heitor Vieira Dourado | NCT04323527 |
| 2 | Oxford University Clinical Research Unit, Vietnam | NCT04328493 |
| Remdesivir | Antiviral | 2, 3 | Oslo University Hospital | NCT04321616 |
| 3 | Institut National de la Santé et de la Recherche Médicale, France | NCT04315948 |
| 2 | Sunnybrook Health Sciences Centre | NCT04330690 |
| 3 | China-Japan Friendship Hospital | NCT04257656 |
| 3 | China-Japan Friendship Hospital | NCT04252664 |
| 3 | Gilead Sciences | NCT04292730 |
| 3 | Gilead Sciences | NCT04292899 |
| 3 | National Institute of Allergy and Infectious Diseases (NIAID) | NCT04280705 |
| Approved for marketing | Gilead Sciences | NCT04323761 |
| Azithromycin | Antibiotic | 2 | Intermountain Health Care, Inc. | NCT04329832 |
| 3 | Ayub Medical College, Abbottabad | NCT04328272 |
| Oseltamivir | Antiviral | 4 (Recruiting) | Tongji Hospital | NCT04255017 |
| 3 | Tongji Hospital | NCT04261270 |
| Camostat | Serine protease inhibitor | 1, 2 | University of Aarhus | NCT04321096 |
| **Combination therapies** | | | | |
| Lopinavir/ritonavir | Antiviral/Antiviral | 2 | Bassett Healthcare | NCT04328012 |
| 2 | Asan Medical Center | NCT04307693 |
| 3 | Institut National de la Santé et de la Recherche Médicale, France | NCT04315948 |
| 3 | Centre Hospitalier Universitaire de Saint Etienne | NCT04328285 |
| 4 (Recruiting) | Tongji Hospital | NCT04255017 |
| 3 | St. Michael's Hospital, Toronto | NCT04321174 |
| 2 | The University of Hong Kong | NCT04276688 |
| Oseltamivir/Chloroquine | Antiviral/Antimalarial | 3 | Rajavithi Hospital | NCT04303299 |
| ASC09F/Oseltamivir | Antiviral/Antiviral | 3 | Tongji Hospital | NCT04261270 |
| Ritonavir/Oseltamivir | Antiviral/Antiviral | 3 | Tongji Hospital | NCT04261270 |
| Danoprevir/Ritonavir | Antiviral/Antiviral | 4 (Recruitment Status Completed) | The Ninth Hospital of Nanchang | NCT04291729 |
| Darunavir/Cobicistat | Antiviral/CYP3A Inhibitor | 3 | Shanghai Public Health Clinical Center | NCT04252274 |
| Hydroxychloroquine/Azithromycin | Antimalarial/Antibiotic | 3 | Hospital do Coração | NCT04322123 |
| 2 | Fundació Institut de Recerca de l'Hospital de la Santa Creu i Sant Pau | NCT04332094 |
| 3 | Hospital Israelita Albert Einstein | NCT04321278 |
| 2 | Chronic Obstructive Pulmonary Disease Trial Network, Denmark | NCT04322396 |
| early 1 | Azidus Brasil | NCT04329572 |
| Darunavir/Ritonavir/Oseltamivir | Antiviral/Antiviral/Antiviral | 3 | Rajavithi Hospital | NCT04303299 |
| Lopinavir/Ritonavir/Oseltamivir | Antiviral/Antiviral/Antiviral | 3 | Rajavithi Hospital | NCT04303299 |
| Favipiravir/Lopinavir/Ritonavir | Antiviral/Antiviral/Antiviral | 3 | Rajavithi Hospital | NCT04303299 |
| Darunavir/Ritonavir/Favipiravir | Antiviral/Antiviral/Antiviral | 3 | Rajavithi Hospital | NCT04303299 |
